# Supplementary material for: Bioinformatic mapping of AlkB homology domains in viruses
Source: Springer Nature journal article supplement (doi:10.1186/1471-2164-6-1), 2005-01-03
Supplement: Additional file 2 [file 1471-2164-6-1-s2.pdf]

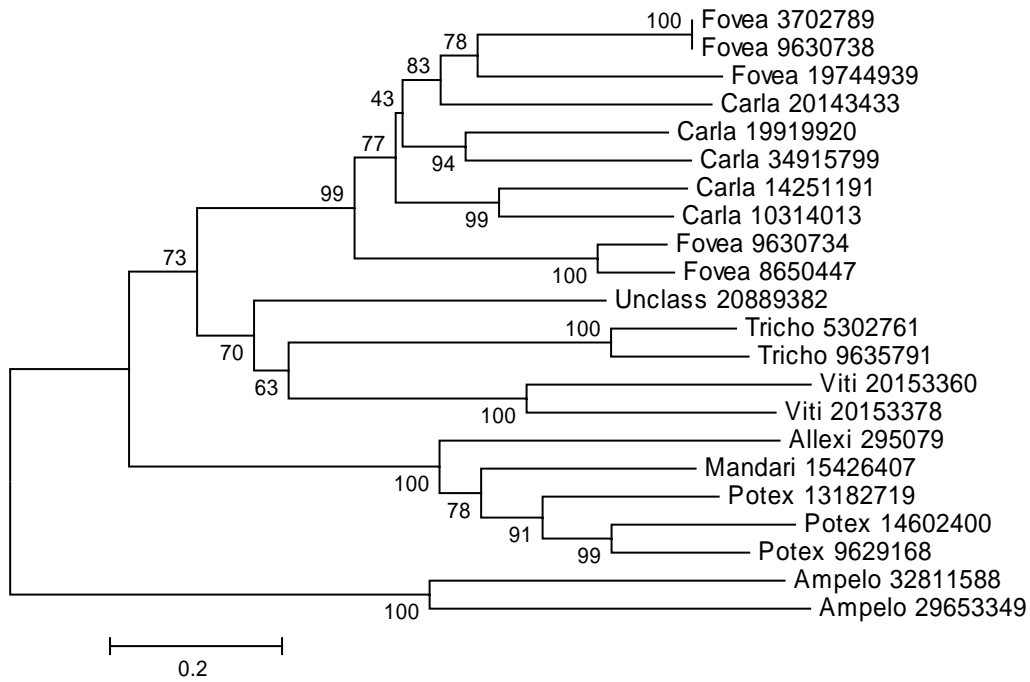

MEGA NJ tree for the HEL domain

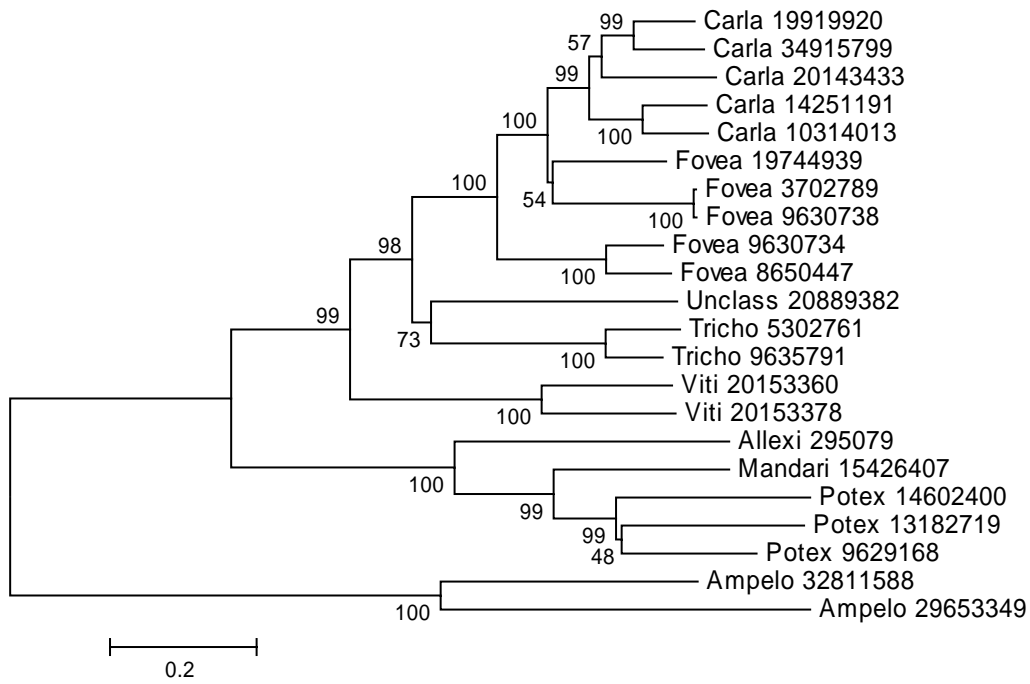

MEGA NJ tree for the RdRp domain

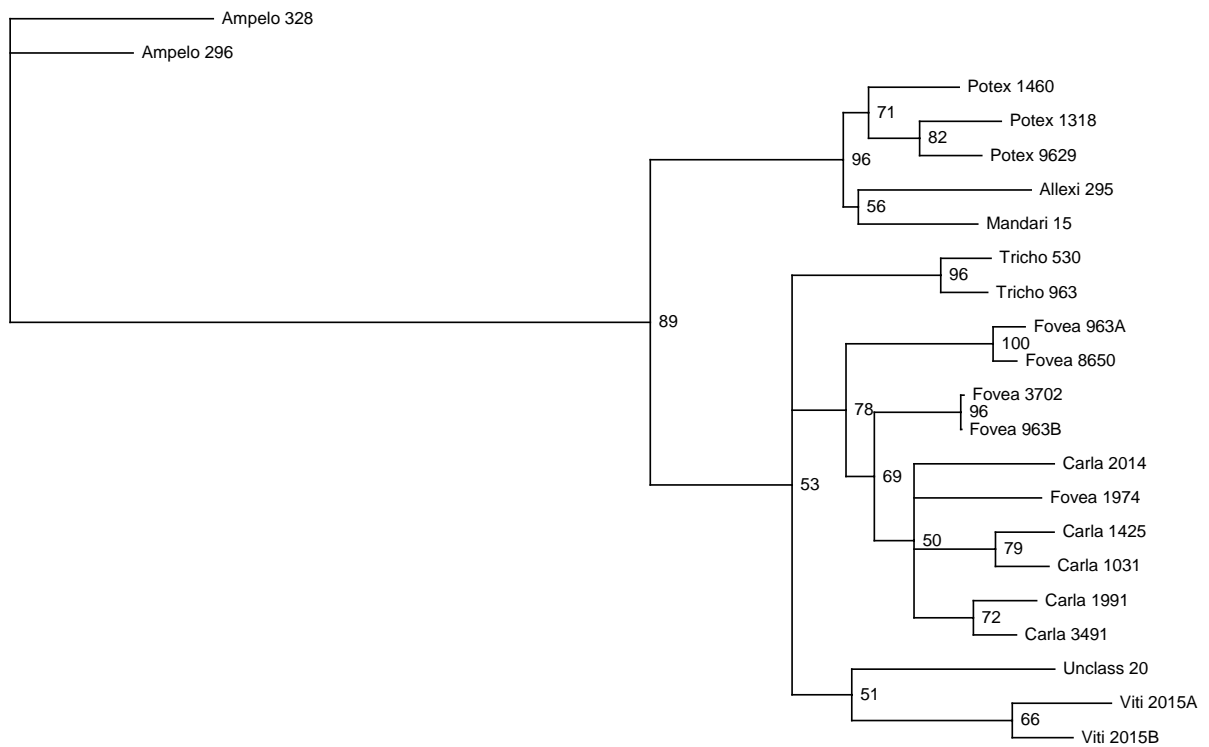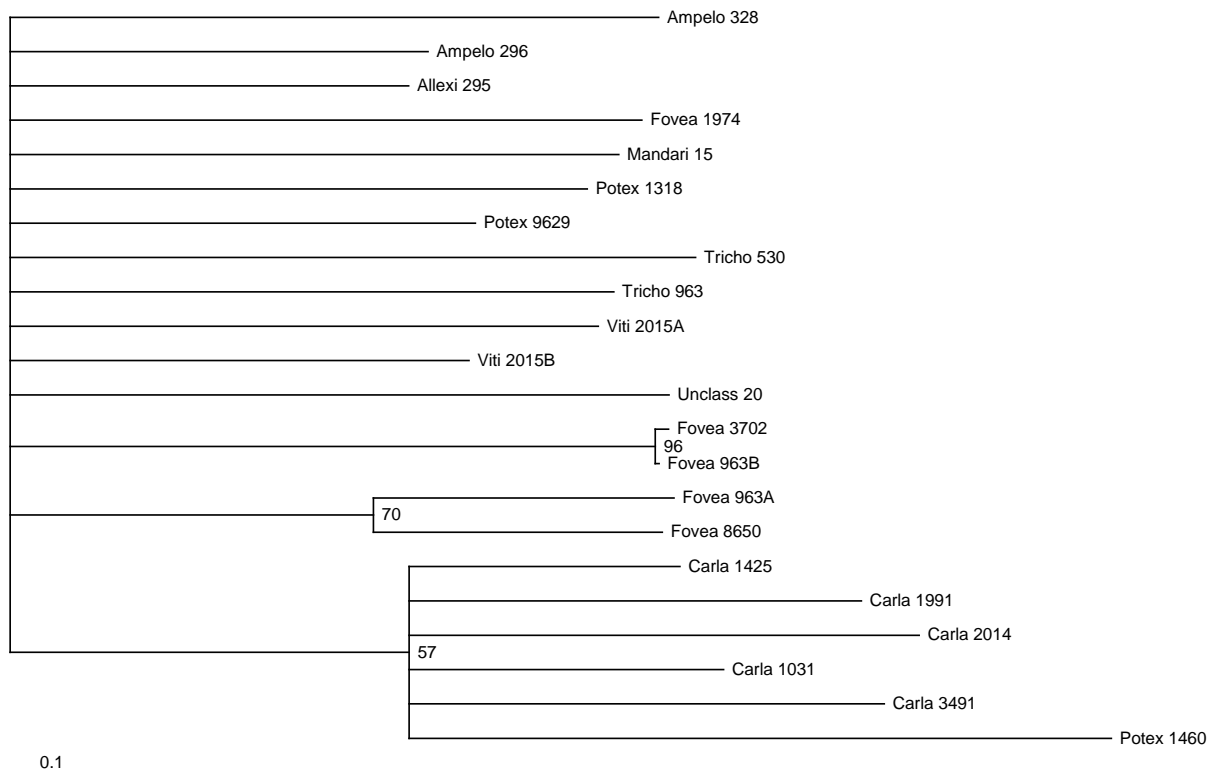

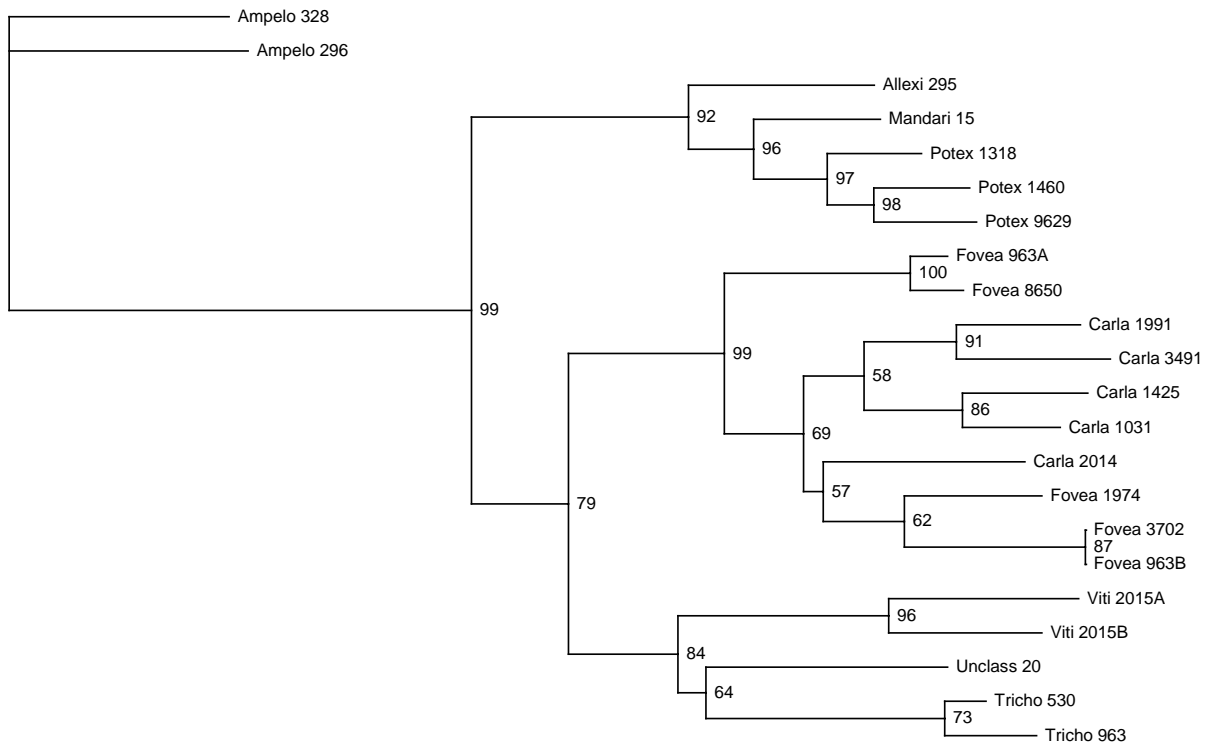

0.1

Tree-Puzzle ML tree for the HEL domain (drawn with TreeView)

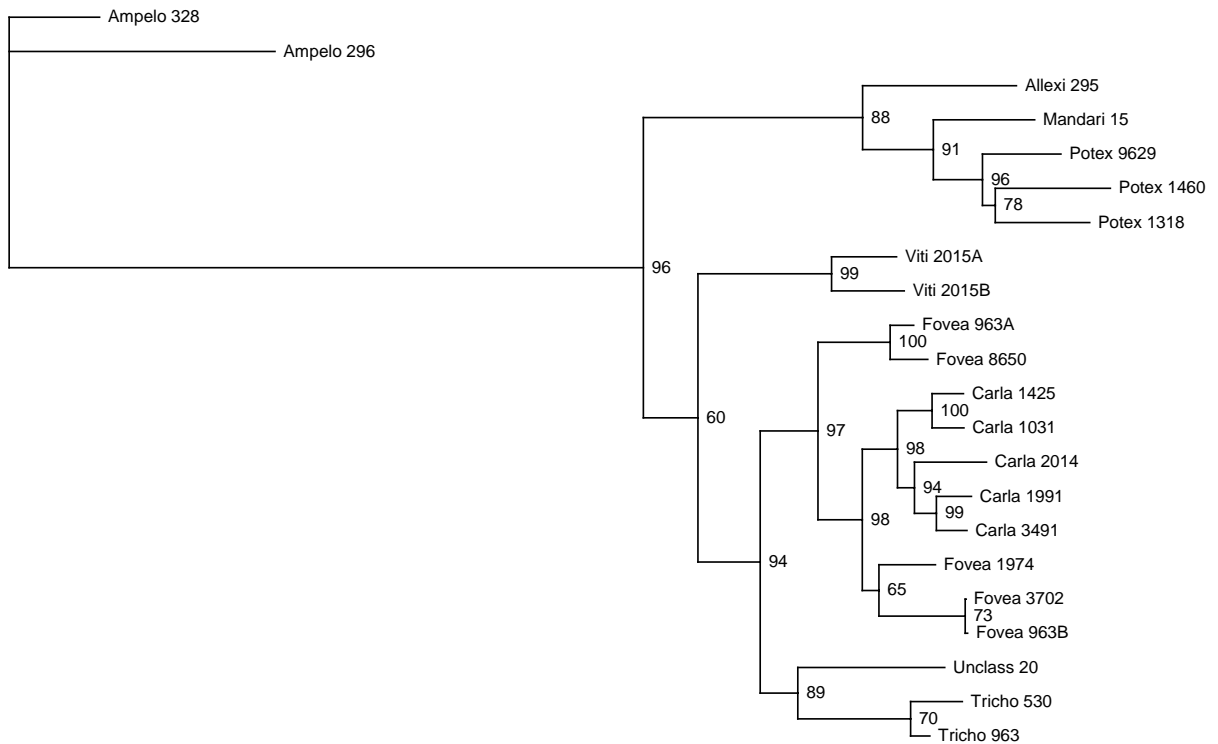

0.1

Tree-Puzzle ML tree for the RdRp domain (drawn with TreeView)
